# Supplementary material for: Modular design of Bi-specific nanoplatform engaged in malignant lymphoma immunotherapy
Source: Royal Society of Chemistry journal article supplement (doi:10.1039/d0nr04450d), 2020-01-01
Supplement: d0nr04450d1.pdf [file d0nr04450d1.pdf]

## Supporting Information

### Modular Design of Bi-specific Nanoplatfrom Engaged in Malignant Lymphoma Immunotherapy

Chen Bai<sup>‡</sup>, Pengcheng Hu<sup>‡</sup>, Wei Zhang, Lina Song, Di Liu, Yi Chen, Ming Ma\*, Ning Gu\*, and Yu Zhang\*

**Table S1.** The coupling rate and coupling quantity of SA and the hydrodynamic sizes and zeta potential of SA@Fe<sub>3</sub>O<sub>4</sub> with the different reactant mass.

| The quantity of iron (μg) | The quantity of SA (μg) | Hydrodynamic size (nm) | Zeta potential (mV) | The quantity of coupled SA (μg) | The number of coupled SA for each nanoparticle | The coupling rate of SA (%) |
|---------------------------|-------------------------|------------------------|---------------------|---------------------------------|------------------------------------------------|-----------------------------|
| 200                       | 0                       | 12.93±1.39             | -15.6±0.87          | ---                             | ---                                            | ---                         |
| 200                       | 50                      | 13.35±0.59             | -15±2.72            | 10.8                            | 0.12                                           | 21.6                        |
| 200                       | 100                     | 15.01±0.04             | -8.53±0.13          | 57.71                           | 0.6                                            | 57.71                       |
| 200                       | 200                     | 15.62±1.46             | -5.31±0.44          | 162.66                          | 1.75                                           | 81.33                       |
| 200                       | 300                     | 14.62±0.63             | -6.13±0.59          | 232.69                          | 2.5                                            | 77.56                       |
| 200                       | 400                     | 14.73±0.33             | -6.56±1.84          | 232.17                          | 2.5                                            | 58.04                       |

The number of SA coupled on the surface of PEG@Fe<sub>3</sub>O<sub>4</sub> nanoparticles was measured and calculated as follows:

$$M_{Fe_3O_4} = \frac{4}{3} \pi r^3 \rho_{Fe_3O_4}$$

$$N_{Fe_3O_4} = \frac{m_{Fe_3O_4}}{M_{Fe_3O_4}}$$

$$N_{SA} = \frac{m_{SA}}{M_{SA}}$$

$$R_{SA/Fe_3O_4} = \frac{N_{SA}}{N_{Fe_3O_4}}$$

Where  $M_{Fe_3O_4}$  represents the relative molecular mass of one Fe<sub>3</sub>O<sub>4</sub> nanoparticle. r is the radius size of nanoparticles.  $\rho_{Fe_3O_4}$  is the density of the Fe<sub>3</sub>O<sub>4</sub>.  $m_{Fe_3O_4}$  and  $m_{SA}$  are the quantity of iron oxide and SA respectively.  $M_{SA}$  is the relative molecular mass of SA which is 66 KDa.  $N_{SA}$  and

$N_{Fe_3O_4}$  are the number of SA and  $Fe_3O_4$  nanoparticle.  $R_{SA/Fe_3O_4}$  is the number of SA for each  $Fe_3O_4$  nanoparticle.

**Table S2.** The number of antibody coupled on the  $Fe_3O_4$  nanoparticles.

|                     | $Fe_3O_4$ nanoparticle<br>( $\mu g$ )<br>(in terms of Fe) | CD20<br>antibody<br>( $\mu g$ ) | CD3<br>antibody<br>( $\mu g$ ) | Coupled<br>antibody<br>( $\mu g$ ) | The number of<br>antibody for each<br>nanoparticle |
|---------------------|-----------------------------------------------------------|---------------------------------|--------------------------------|------------------------------------|----------------------------------------------------|
| CD20@ $Fe_3O_4$     | 500                                                       | 1500                            | 0                              | 1250                               | $\sim 2.64$                                        |
| CD20&CD3@ $Fe_3O_4$ | 500                                                       | 750                             | 750                            | 1200                               | $\sim 2.55$                                        |

The number of antibody coupled on the surface of SA@ $Fe_3O_4$  nanoparticles was measured and calculated as follows:

$$M_{Fe_3O_4} = \frac{4}{3} \pi r^3 \rho_{Fe_3O_4}$$

$$N_{Fe_3O_4} = \frac{m_{Fe_3O_4}}{M_{Fe_3O_4}}$$

$$N_{antibody} = \frac{m_{antibody}}{M_{antibody}}$$

$$R_{antibody/Fe_3O_4} = \frac{N_{antibody}}{N_{Fe_3O_4}}$$

Where  $M_{Fe_3O_4}$  represents the relative molecular mass of one  $Fe_3O_4$  nanoparticle.  $r$  is the radius size of nanoparticles.  $\rho_{Fe_3O_4}$  is the density of the  $Fe_3O_4$ .  $m_{Fe_3O_4}$  and  $m_{SA}$  are the quantity of iron oxide and SA respectively.  $M_{antibody}$  is the average molecular mass of CD20 and CD3 antibody which is 140 KDa.  $N_{antibody}$  and  $N_{Fe_3O_4}$  are the number of antibody and  $Fe_3O_4$  nanoparticle.  $R_{antibody/Fe_3O_4}$  is the number of antibody for each  $Fe_3O_4$  nanoparticle.

**Table S3.** The relaxation properties of different test samples.

| Type                | $r_1$ ( $mM^{-1}s^{-1}$ ) | $r_2 / r_1$ |
|---------------------|---------------------------|-------------|
| PEG@ $Fe_3O_4$      | 8.15                      | 3.58        |
| SA@ $Fe_3O_4$       | 7.06                      | 4.21        |
| CD20&CD3@ $Fe_3O_4$ | 5.27                      | 4.36        |
| Magnevist           | 4.52                      | —           |

**Table S4.** The median survival time of mice with different treatment groups.

| Type                     | PBS | T cell | CD20&CD3@Fe <sub>3</sub> O <sub>4</sub> | T cell+<br>CD20&CD3@Fe <sub>3</sub> O <sub>4</sub> |
|--------------------------|-----|--------|-----------------------------------------|----------------------------------------------------|
| Median survival<br>(day) | 39  | 40     | 56                                      | 69                                                 |

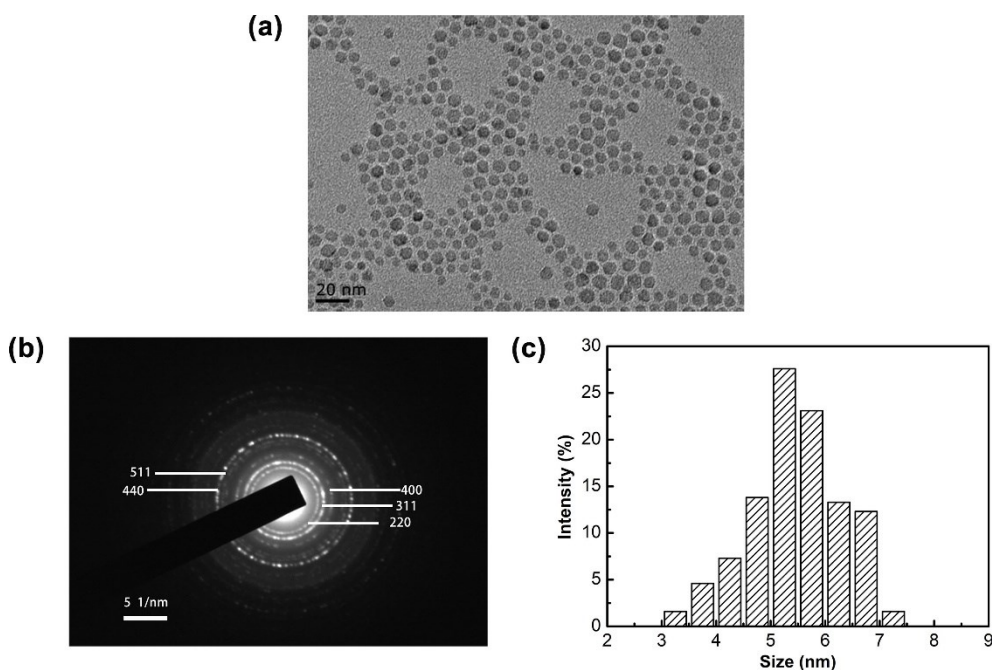

**Figure S1.** (a)TEM image and (b) electron diffraction pattern of OAm@Fe<sub>3</sub>O<sub>4</sub>, (c) a size distribution histogram of OAm@Fe<sub>3</sub>O<sub>4</sub> in TEM imaging. ( $D_{\text{TEM}} = 5.5 \pm 0.6$  nm).

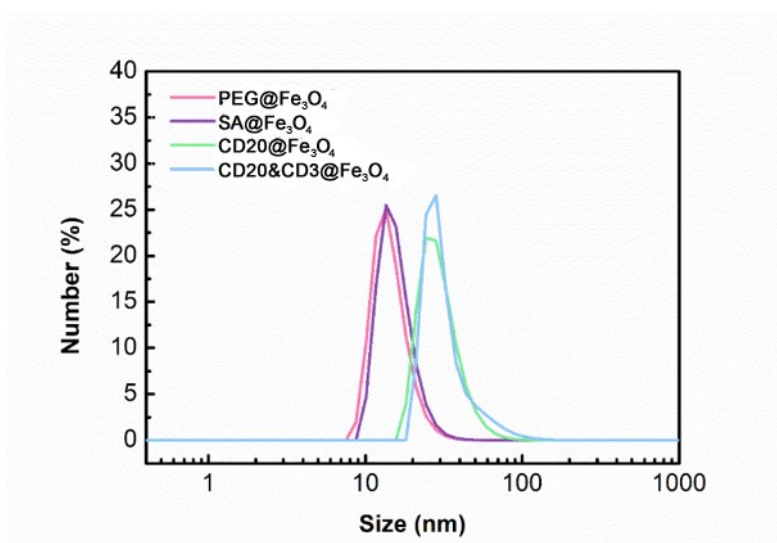

**Figure S2.** The hydrodynamic size of Fe<sub>3</sub>O<sub>4</sub> nanoparticles with different surface modification.

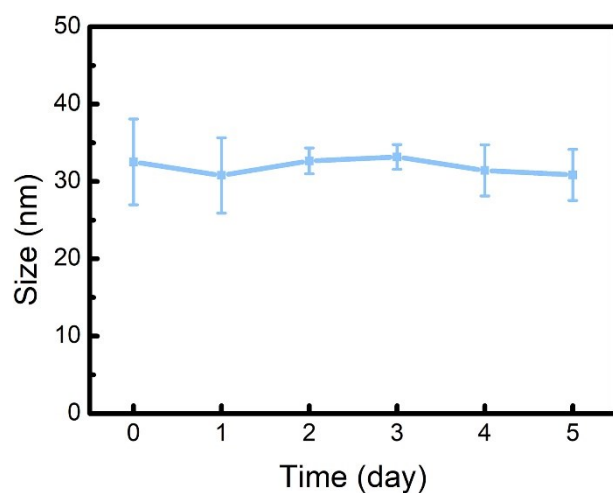

**Figure S3.** The stability of BSNP

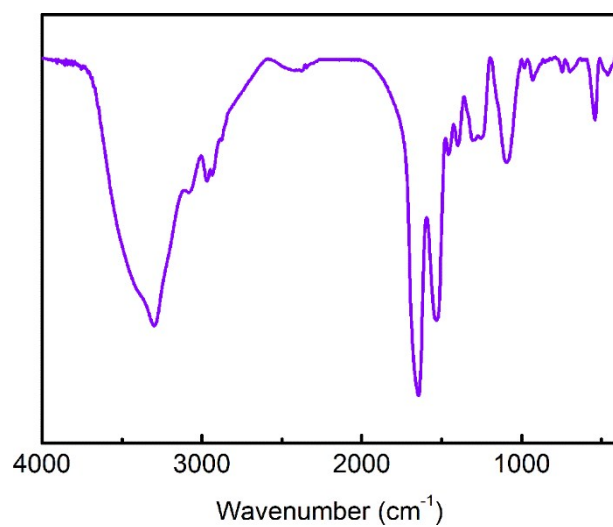

**Figure S4.** The IR spectra of SA.

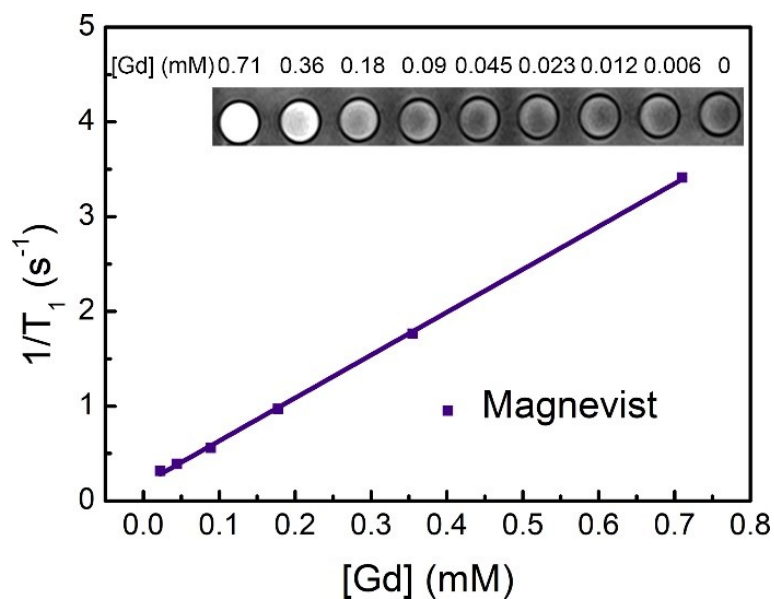

**Figure S5.** Plot of  $1/T_1$  against Gd concentration of Magnevist in water under 3.0 T MR scanner (The slope of the corresponding linear fit was the relaxivity). The inner image is  $T_1$ -weighted MR images of Magnevist with different Gd concentrations in water.

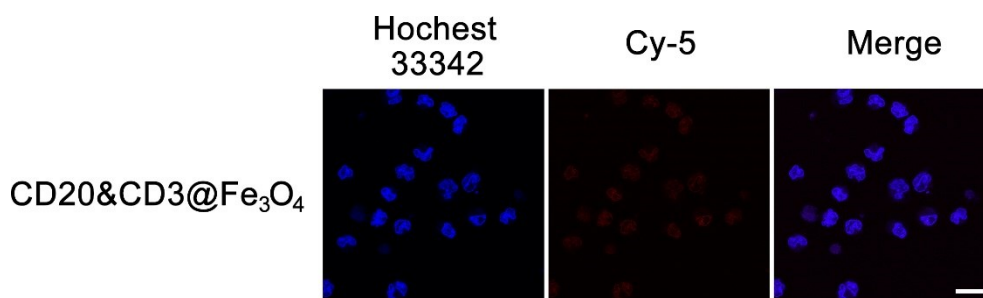

**Figure S6.** The laser confocal image of living Raji cells co-cultured with BSNP(The scale bar is 50  $\mu\text{m}$ ).

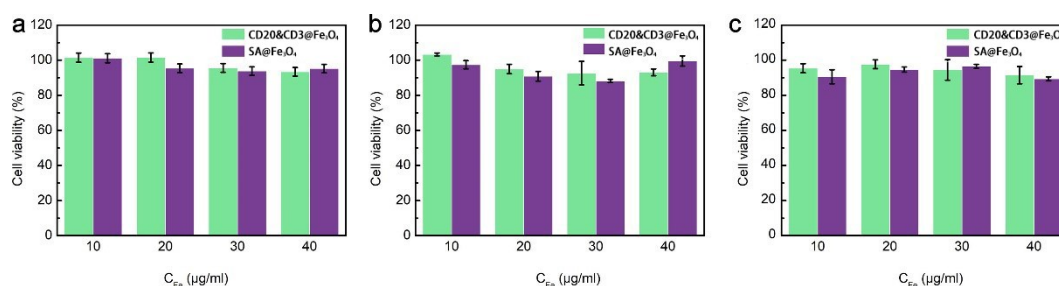

**Figure S7.** Cell viabilities of K562 cells incubated with different concentration of SA@Fe<sub>3</sub>O<sub>4</sub> and CD20@Fe<sub>3</sub>O<sub>4</sub> for (a) 24 hours, (b) 48 hours, and (c) 72 hours.

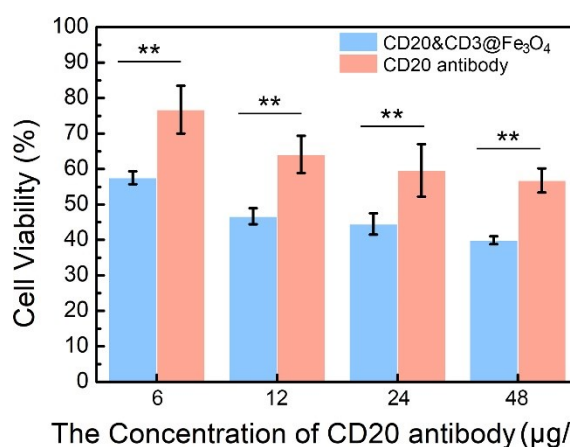

**Figure S8.** Cell viabilities of Raji cells incubated with different antibody concentration of CD20&CD3@Fe<sub>3</sub>O<sub>4</sub> and CD20 antibody for 24 hours.

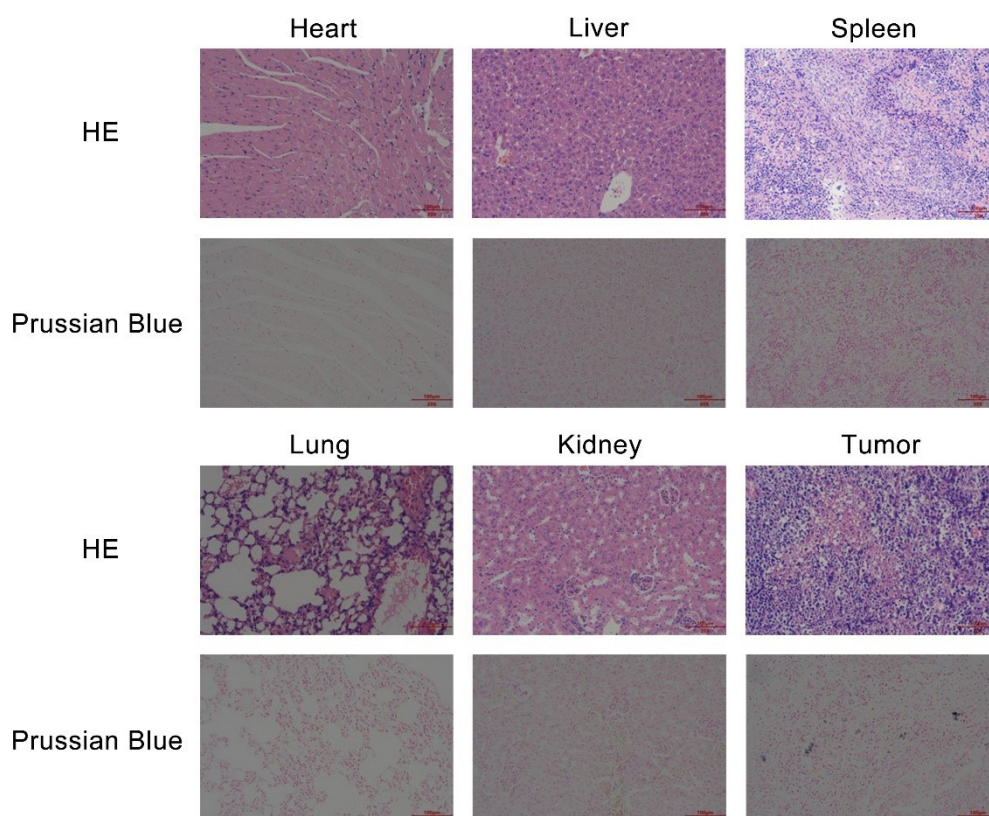

**Figure S9.** The histochemical staining and Prussian blue staining images of tumor and organs. (The scale bar is 100  $\mu$ m)

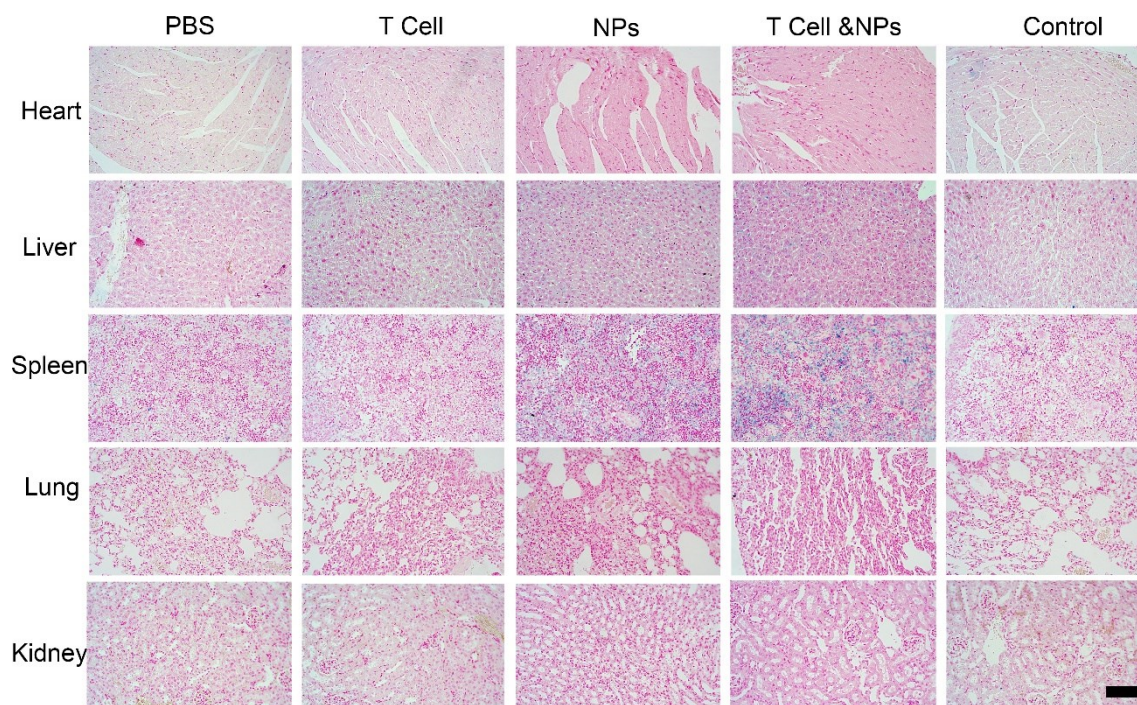

**Figure S10.** The Prussian blue staining images of organs with different treatment groups. (The scale bar is 100  $\mu$ m, NPs represents BSNP, Control is the slides of healthy mice)

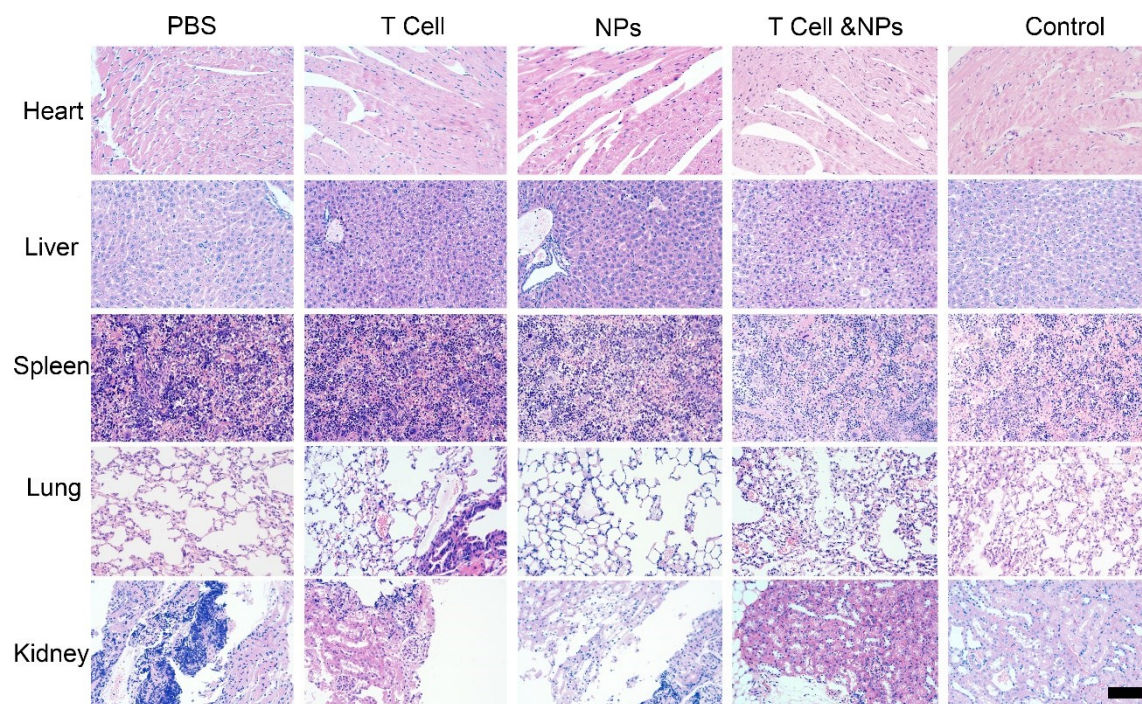

**Figure S11.** The histochemical staining images of organs with different treatment groups. (The scale bar is 100  $\mu$ m, NPs represents BSNP, Control is the slides of healthy mice).
